# Supplementary material for: Observations of microphysical properties and radiative effects of contrail cirrus and natural cirrus over the North Atlantic
Source: Copernicus journal article supplement (doi:10.5194/acp-2022-537), 2022-08-26
Supplement: Supplementary file [file acp-2022-537-AC4-supplement.pdf]

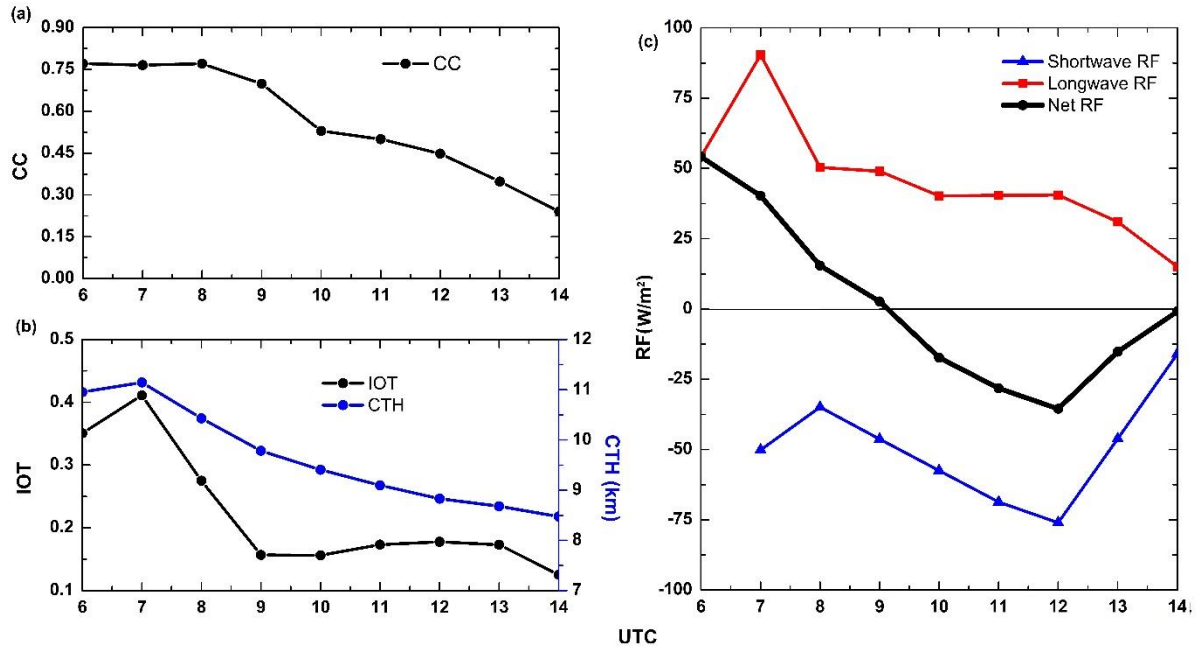

Figure 7/A2: The variations of (a) CC, (b) mean IOT and mean CTH, and (c) SW, LW and net RF within the area indicated by a red box in Fig. 2
